# Supplementary material for: The CXCR4 antagonist plerixafor (AMD3100) promotes proliferation of Ewing sarcoma cell lines in vitro and activates receptor tyrosine kinase signaling
Source: PubMed Central journal article supplement (PMC5960216; doi:10.1186/s12964-018-0233-2), 2018-05-18
Supplement: 12964_2018_233_MOESM2_ESM.pdf [file 12964_2018_233_MOESM2_ESM.pdf]

## Additional file 2: Supplementary Table

**Table S1. Plerixafor treatment changes receptor tyrosine kinase phosphorylation patterns in CXCR4-high and -low Ewing sarcoma cell lines.** This is the full data set corresponding to Fig 5. A phospho-RTK array was probed with whole cell lysates of CXCR4-low A673 and CXCR4-high TC-32 cells treated with 1  $\mu$ M plerixafor or DMSO vehicle for 1 h. Mean pixel densities of duplicate RTK capture spots were measured and normalized to mean pixel densities of control spots of respective membranes. Fold changes (fc) of plerixafor-treated compared to control cells were calculated.

| RTK     | A673               |            |      | TC32               |            |      |
|---------|--------------------|------------|------|--------------------|------------|------|
|         | mean pixel density |            |      | mean pixel density |            |      |
|         | DMSO               | Plerixafor | fc   | DMSO               | Plerixafor | fc   |
| EGFR    | 13748.0            | 23305.5    | 1.70 | 2182.0             | 3928.5     | 1.80 |
| ERBB2   | 13164.0            | 9942.5     | 0.76 | 14170.0            | 11516.5    | 0.81 |
| ERBB3   | 3294.5             | 3405.0     | 1.03 | 3453.0             | 8607.5     | 2.49 |
| ERBB4   | 9007.5             | 6901.5     | 0.77 | 12855.5            | 21262.0    | 1.65 |
| FGFR1   | 8276.0             | 6360.0     | 0.77 | 4867.0             | 10510.0    | 2.16 |
| FGFR2   | 8921.0             | 8665.5     | 0.97 | 6073.5             | 10274.0    | 1.69 |
| FGFR3   | 7614.5             | 4650.0     | 0.61 | 5176.5             | 6715.0     | 1.30 |
| FGFR4   | 9846.5             | 6375.0     | 0.65 | 6756.5             | 7459.5     | 1.10 |
| INSR    | 24793.0            | 24092.0    | 0.97 | 50665.0            | 47081.0    | 0.93 |
| IGF1R   | 26926.0            | 14093.5    | 0.52 | 36182.5            | 28787.0    | 0.80 |
| AXL     | 4369.5             | 2920.5     | 0.67 | 1539.0             | 1659.0     | 1.08 |
| TYR03   | 35164.5            | 23953.5    | 0.68 | 15339.0            | 10571.0    | 0.69 |
| MERTK   | 12803.0            | 12310.5    | 0.96 | 9848.5             | 23400.0    | 2.38 |
| MET     | 5569.0             | 3385.0     | 0.61 | 3960.5             | 8983.0     | 2.27 |
| MST1R   | 12779.0            | 15454.0    | 1.21 | 16481.0            | 23866.5    | 1.45 |
| PDGFRA  | 5712.5             | 4523.5     | 0.79 | 7391.0             | 9518.0     | 1.29 |
| PDGFRB  | 12491.5            | 31714.0    | 2.54 | 11238.0            | 21971.0    | 1.96 |
| KIT     | 9276.5             | 7679.0     | 0.83 | 14931.5            | 17872.5    | 1.20 |
| FLT3    | 7788.5             | 4961.0     | 0.64 | 5947.0             | 8322.5     | 1.40 |
| M-CSF R | 15140.0            | 9776.0     | 0.65 | 14373.5            | 12339.5    | 0.86 |
| RET     | 12167.0            | 11016.0    | 0.91 | 9849.0             | 15873.0    | 1.61 |
| ROR1    | 9513.0             | 7374.5     | 0.78 | 2669.0             | 5206.5     | 1.95 |
| ROR2    | 10366.5            | 8265.0     | 0.80 | 6728.0             | 4476.0     | 0.67 |
| TIE1    | 5250.0             | 4613.5     | 0.88 | 3456.5             | 1665.0     | 0.48 |
| TEK     | 10437.5            | 6740.5     | 0.65 | 8337.0             | 16702.0    | 2.00 |
| NTRK1   | 14853.5            | 13164.0    | 0.89 | 9654.0             | 20442.0    | 2.12 |
| NTRK2   | 5018.0             | 4295.0     | 0.86 | 4335.5             | 11669.5    | 2.69 |
| NTRK3   | 9329.0             | 3853.0     | 0.41 | 6852.0             | 8847.0     | 1.29 |
| VEGFRA  | 8758.5             | 8247.5     | 0.94 | 10988.0            | 9260.5     | 0.84 |
| KDR     | 10847.0            | 10580.0    | 0.98 | 12564.0            | 15287.0    | 1.22 |
| FLT4    | 20857.5            | 13783.0    | 0.66 | 19550.5            | 26369.5    | 1.35 |
| MUSK    | 8262.0             | 5367.0     | 0.65 | 8137.0             | 11642.5    | 1.43 |
| EPHA1   | 12138.5            | 14020.0    | 1.16 | 13374.0            | 13932.5    | 1.04 |
| EPHA2   | 4902.5             | 4576.5     | 0.93 | 3678.0             | 5298.5     | 1.44 |
| EPHA3   | 4086.5             | 1870.5     | 0.46 | 1736.0             | 1675.0     | 0.97 |
| EPHA4   | 16254.0            | 12549.0    | 0.77 | 12279.5            | 6875.0     | 0.56 |
| EPHA6   | 3633.0             | 2893.5     | 0.80 | 2970.5             | 4960.0     | 1.67 |
| EPHA7   | 7360.5             | 4014.0     | 0.55 | 2887.5             | 4443.5     | 1.54 |
| EPHB1   | 11317.5            | 6267.0     | 0.55 | 7159.0             | 9779.5     | 1.37 |
| EPHB2   | 6605.0             | 4191.0     | 0.63 | 7281.0             | 9793.5     | 1.35 |
| EPHB4   | 7299.5             | 4874.0     | 0.67 | 7012.0             | 5681.0     | 0.81 |
| EPHB6   | 3966.5             | 2401.5     | 0.61 | 8088.0             | 5417.0     | 0.67 |
| ALK     | 19251.0            | 16074.0    | 0.84 | 34938.5            | 30588.5    | 0.88 |
| DDR1    | 13107.0            | 8960.5     | 0.68 | 16956.0            | 13041.0    | 0.77 |
| DDR2    | 17087.0            | 16704.5    | 0.98 | 11030.0            | 18538.5    | 1.68 |
| EPHA5   | 12479.5            | 12481.5    | 1.00 | 5875.5             | 8046.0     | 1.37 |
| EPHA10  | 44229.0            | 45610.5    | 1.03 | 39823.0            | 34515.0    | 0.87 |
| EPHB3   | 7405.0             | 5630.0     | 0.76 | 5630.5             | 8337.0     | 1.48 |
| RYK     | 23198.0            | 22865.0    | 0.99 | 19124.5            | 37438.5    | 1.96 |
